# Supplementary material for: Pathogenic Germline Mutations of DNA Repair Pathway Components in Early-Onset Sporadic Colorectal Polyp and Cancer Patients
Source: PubMed Central journal article supplement (PMC7761471; doi:10.3390/cancers12123560), 2020-11-28
Supplement: cancers-12-03560-s001.pdf [file cancers-12-03560-s001.pdf]

## *Supplementary Materials*

# **Pathogenic Germline Mutations of DNA Repair Pathway Components in Early-onset Sporadic Colorectal Polyp and Cancer Patients**

**Pi-Yueh Chang**<sup>1,2</sup>, **Shih-Cheng Chang**<sup>1,2</sup>, **Mei-Chia Wang**<sup>1,2</sup>, **Jinn-Shiun Chen**<sup>3</sup>, **Wen-Sy Tsai**<sup>3</sup>, **Jeng-Fu You**<sup>3</sup>, **Chia-Chun Chen**<sup>4</sup>, **Hsiu-Ling Liu**<sup>1</sup> and **Jy-Ming Chiang**<sup>3,\*</sup>

<sup>1</sup> Department of Laboratory Medicine, Chang Gung Memorial Hospital, No. 5 Fu-Shing St. Kweishan, Taoyuan 33305, Taiwan ; changpy@adm.cgmh.org.tw (P.-Y.C.); changsc137@cgmh.org.tw (S.-C.C.); ottermika@cgmh.org.tw (M.-C.W.); s48633001@cgmh.org.tw (H.-J.L.)

<sup>2</sup> Department of Medical Biotechnology and Laboratory Science, Chang Gung University, No. 259, Wenhua 1<sup>st</sup> Rd., Kweishan, Taoyuan 33302, Taiwan

<sup>3</sup> Department of Colorectal Surgery, Chang Gung Memorial Hospital, No. 5 Fu-Shing St. Kweishan, Taoyuan 33305, Taiwan; chenjs@cgmh.org.tw (J.-S.C.); wensyt@gmail.com (W.-S.T.); you3368@cgmh.org.tw (J.-F.Y.)

<sup>4</sup> Molecular Medicine Research Center, Chang Gung University, No. 259, Wenhua 1<sup>st</sup> Rd., Kweishan, Taoyuan 33302, Taiwan; chenchiachun@gap.cgu.edu.tw (C.-C.C.)

\* Correspondence to: jmjiang@cgmh.org.tw (J.-M.C.); Tel: 886-3-2281200 ext. 2101; Fax: 886-3- 3285818

**Supplementary Table 1:** Detailed clinical and genetic information for the nine mutation carriers

| Group  | sample ID | Age | Gender | Stage | Gene  | Zygoty       | Location | NT Change    | A.A. Change  | Mutation type        | ClinVar/VarSome annotation      | ExAc_EAS |
|--------|-----------|-----|--------|-------|-------|--------------|----------|--------------|--------------|----------------------|---------------------------------|----------|
| Normal | 2307      | 39  | M      |       | BRCA2 | Heterozygous | exon11   | c.2652dupA   | p.D885Rfs*2  | frameshift insertion | Not reported /Pathogenic        |          |
| Polyps | 1941      | 41  | F      |       | CHEK2 | Heterozygous | exon4    | c.472delA    | p.I158Yfs*9  | frameshift deletion  | Not reported/ Likely Pathogenic | 0.0006   |
| Polyps | 1972      | 49  | F      |       | CHEK2 | Heterozygous | exon4    | c.472delA    | p.I158Yfs*9  | frameshift deletion  | Not reported/ Likely Pathogenic | 0.0006   |
| CRC    | 1657      | 46  | F      | IV    | BLM   | Heterozygous | exon19   | c.3566delT   | p.F1189Lfs*9 | frameshift deletion  | Likely pathogenic/ Pathogenic   |          |
| CRC    | 2299      | 48  | M      | III   | MLH1  | Heterozygous | exon10   | c.C793T      | p.R265C      | nonsynonymous SNV    | Pathogenic/ Pathogenic          |          |
| CRC    | 2423      | 46  | M      | II    | MLH1  | Heterozygous | exon11   | c.C1029A     | p.Y343X      | stopgain             | Not reported/Pathogenic         |          |
| CRC    | 2757      | 48  | F      | IV    | MLH1  | Heterozygous | exon10   | c.C793T      | p.R265C      | nonsynonymous SNV    | Pathogenic/ Pathogenic          |          |
| CRC    |           |     |        |       | BRCA1 | Heterozygous | exon15   | c.C4729T     | p.Q1577X     | stopgain             | Pathogenic/ Pathogenic          |          |
| CRC    | 3248      | 36  | M      | III   | MLH1  | Heterozygous | exon11   | c.C1029A     | p.Y343X      | stopgain             | Not reported/ Pathogenic        |          |
| CRC    | SP-0129   | 38  | F      | IV    | NTHL1 | Heterozygous | exon4    | c.699_700del | p.S234Rfs*37 | frameshift deletion  | Not reported/ Pathogenic        |          |

SNV: single-nucleotide variant; MAF in ExAc\_EAS: minor allele frequency in the Exome Aggregation Consortium\_East Asia

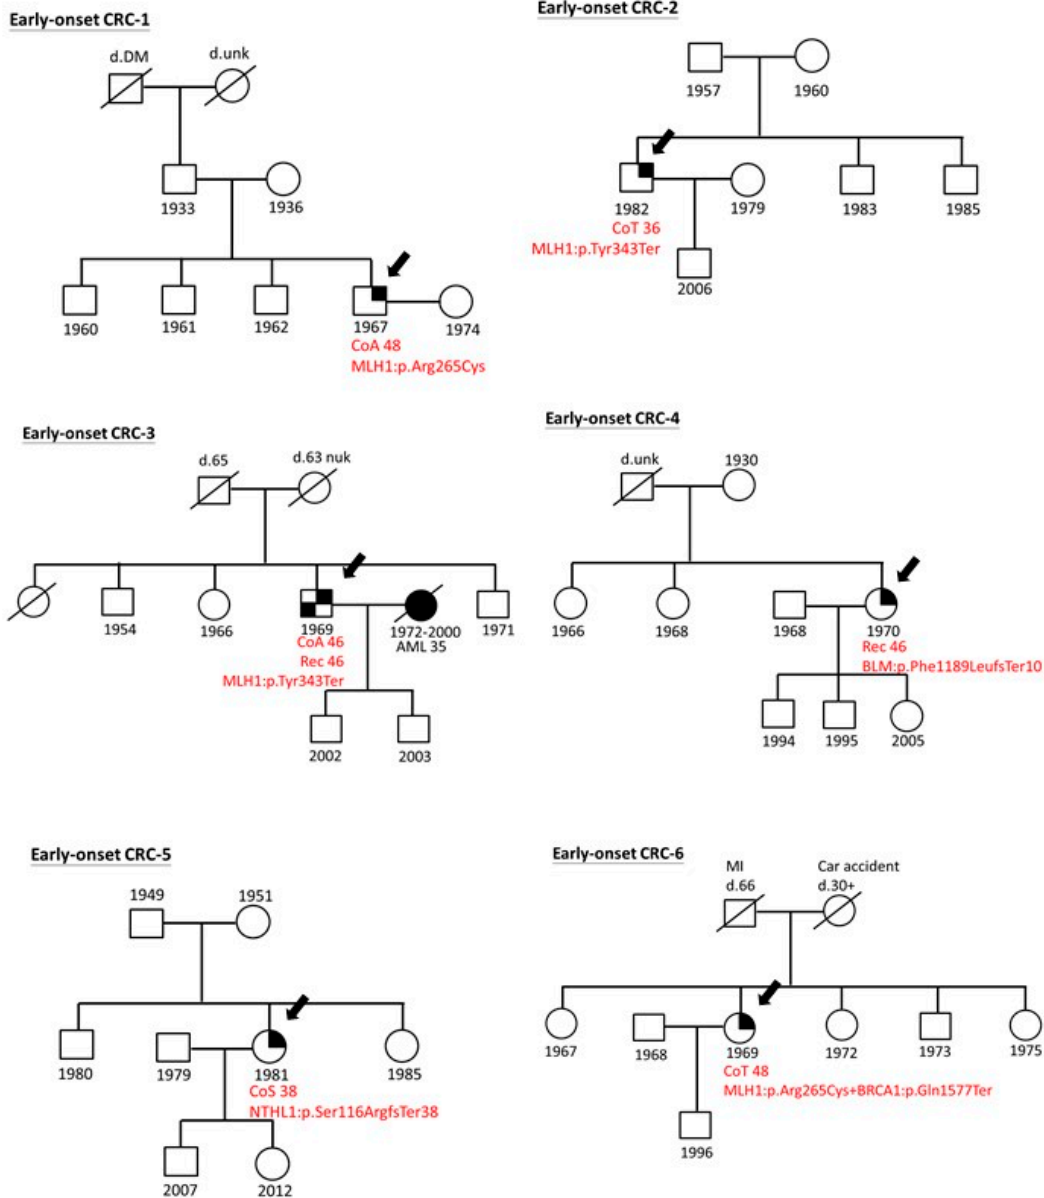

1

2 **Supplementary Figure 1.** Three-generation pedigree trees of six sporadic early-onset CRC proband  
 3 families. The arrow points out the proband in the family. The number below the square or circle symbol  
 4 stands for the birth year of the family member. The three letters and two-digit number below the  
 5 proband represent for the cancer location and the age with cancer diagnosis. For example: CoT 48  
 6 indicates the patient got the diagnosis at 48 years old and the cancer was located at the Transverse  
 7 colon. A: Ascending; S: Sigmoid; Rec: Rectum. Mutations which the proband carried were denoted in  
 8 the third row.
